# Supplementary material for: Association between cMIND Diet adherence and frailty among Chinese older adults: A 10-Year Longitudinal Study
Source: Research Square preprint supplement (doi:10.21203/rs.3.rs-7307545/v1), 2025-09-12
Supplement: Supplementary file 1 [file a0ee719f44701be3d4f2c5f5.docx]

**Table S1. The components and scores of the cMIND diet**

| **Components** | **Score 0** | **Score 0.5** | **Score 1** |
| --- | --- | --- | --- |
| Type of staple food | Rice/wheat |  | Whole grains |
| Amount of staple food | <250g or >400g |  | 250-400g |
| Fresh vegetables | ≤2 servings/week | 3-5 servings/week | ≥6 servings/week |
| Mushroom or algae | <1 servings/week | 1-3 servings/week | ≥4 servings/week |
| Fresh fruit | ≤2 servings/week | 3-5 servings/week | ≥6 servings/week |
| Cooking oil | Animal oil |  | Vegetable oil |
| Fish | <1 meal/month | 1-3 meal/month | ≥1 meal/week |
| Soybeans | <1 meal/month | 1-3 meal/month | ≥1 meal/week |
| Nuts | <1 servings/month | 1-4 servings/month | ≥5 servings/week |
| Garlic | <1 meal/week | 1-3 meal/week | ≥4 meals/week |
| Tea | Not almost every day | Other types of tea (almost every day) | Green tea (almost every day) |
| Sugar or sweets | ≥2 servings/week | 1 serving/month-1 serving/week | <1 serving/month |

**Table S2. List of items included in the frailty index.**

| **Number** | **Variables** |
| --- | --- |
| 1 | IADLs: Unable to visit neighbors by oneself |
| 2 | IADLs: Unable to shop by oneself if necessary |
| 3 | IADLs: Unable to cook meals by oneself if necessary |
| 4 | IADLs: Unable to wash clothing by oneself |
| 5 | IADLs: Unable to walk continuously for 1 kilometer |
| 6 | IADLs: Unable to lift a weight of 5 kg (such as a heavy bag of groceries) |
| 7 | IADLs: Unable to continuously crouch and stand up three times |
| 8 | IADLs: Unable to take public transportation |
| 9 | Functional limitations: Unable to put hand behind neck |
| 10 | Functional limitations: Unable to put hand behind lower back |
| 11 | Functional limitations: Unable to raise arm upright |
| 12 | Functional limitations: Unable to stand up from sitting in a chair |
| 13 | Functional limitations: Unable to pick up a book from the floor |
| 14 | ADLs: Needs assistance in bathing |
| 15 | ADLs: Needs assistance in dressing |
| 16 | ADLs: Needs assistance in toileting |
| 17 | ADLs: Needs assistance in indoor transfer |
| 18 | ADLs: Needs assistance in eating |
| 19 | ADLs: Incontinence |
| 20 | Cognitive impairment (based on the Mini Mental State Examination using education-based cutoffs) |
| 21 | Poor self-rated health |
| 22 | Health worsened in the past year |
| 23 | Poor interviewer-rated health |
| 24 | Hearing loss |
| 25 | Vision loss |
| 26 | Abnormal heart rate |
| 27 | Symptom of psychological distress (based on loneliness, usefulness, and fearfulness) |
| 28 | Number of serious illnesses in the past 2 years (severe illness means  hospitalization or bedridden at home) |
| 29 | Suffering from hypertension |
| 30 | Suffering from diabetes |
| 31 | Suffering from tuberculosis |
| 32 | Suffering from heart disease |
| 33 | Suffering from stroke/cerebrovascular disease |
| 34 | Suffering from bronchitis, emphysema, asthma, or pneumonia |
| 35 | Suffering from cancer |
| 36 | Suffering from arthritis |
| 37 | Suffering from bedsores |
| 38 | Suffering from gastric or duodenal ulcers |
| 39 | Suffering from Parkinson's disease |
